# Supplementary material for: Do Social Exchange Relationships Influence Total-Quality-Management Involvement? Evidence from Frontline Employees of International Hotels
Source: MDPI journal article supplement (doi:10.3390/bs13121013), 2023-12-14
Supplement: s1 [file s1]

## SECTION I

■ Please respond to the following questions

| <i>LMX</i>                                                                                                                            | Strongly<br>Disagree |     | Neutral |     | Strongly<br>Agree |         |
|---------------------------------------------------------------------------------------------------------------------------------------|----------------------|-----|---------|-----|-------------------|---------|
| 1. My leader would be personally inclined to help me solve problems in my work.                                                       | 1--                  | 2-- | 3--     | 4-- | 5--               | 6-- 7-- |
| 2. I have enough confidence in my leader that I would defend and justify his or her decisions if he or she were not present to do so. | 1--                  | 2-- | 3--     | 4-- | 5--               | 6-- 7-- |
| 3. My working relationship with my supervisor is effective.                                                                           | 1--                  | 2-- | 3--     | 4-- | 5--               | 6-- 7-- |
| 4. My supervisor considers my suggestions for change.                                                                                 | 1--                  | 2-- | 3--     | 4-- | 5--               | 6-- 7-- |
| 5. My supervisor and I are suited to each other.                                                                                      | 1--                  | 2-- | 3--     | 4-- | 5--               | 6-- 7-- |
| 6. My supervisor understands my problems and needs.                                                                                   | 1--                  | 2-- | 3--     | 4-- | 5--               | 6-- 7-- |
| 7. My supervisor recognizes my potential.                                                                                             | 1--                  | 2-- | 3--     | 4-- | 5--               | 6-- 7-- |
| <i>TMX</i>                                                                                                                            |                      |     |         |     |                   |         |
| 1. I will help finish work that had been assigned to others.                                                                          | 1--                  | 2-- | 3--     | 4-- | 5--               | 6-- 7-- |
| 2. I will make suggestions about better work methods to other team members.                                                           | 1--                  | 2-- | 3--     | 4-- | 5--               | 6-- 7-- |
| 3. I will switch job responsibilities to make things easier for other team members.                                                   | 1--                  | 2-- | 3--     | 4-- | 5--               | 6-- 7-- |
| 4. Other members of my team will help finish work that was assigned to me.                                                            | 1--                  | 2-- | 3--     | 4-- | 5--               | 6-- 7-- |
| 5. Other members of my team will make suggestions about better work methods to me.                                                    | 1--                  | 2-- | 3--     | 4-- | 5--               | 6-- 7-- |
| 6. Other members of my team will switch job responsibilities to make things easier for me.                                            | 1--                  | 2-- | 3--     | 4-- | 5--               | 6-- 7-- |
| <i>Self-efficacy</i>                                                                                                                  |                      |     |         |     |                   |         |
| 1. I could have handled a more challenging job than the one I will be doing.                                                          | 1--                  | 2-- | 3--     | 4-- | 5--               | 6-- 7-- |
| 2. My past experiences and accomplishments increase my confidence that I will be able to perform successfully in this organization.   | 1--                  | 2-- | 3--     | 4-- | 5--               | 6-- 7-- |
| 3. I feel I am overqualified for the job.                                                                                             | 1--                  | 2-- | 3--     | 4-- | 5--               | 6-- 7-- |
| 4. I have confidence in my ability to solve problems.                                                                                 | 1--                  | 2-- | 3--     | 4-- | 5--               | 6-- 7-- |

(continued)

| <b><i>Job satisfaction</i></b>                                                               | <b>Strongly<br/>Disagree</b> |     | <b>Neutral</b> |     | <b>Strongly<br/>Agree</b> |         |
|----------------------------------------------------------------------------------------------|------------------------------|-----|----------------|-----|---------------------------|---------|
| 1. In general, I like my job.                                                                | 1--                          | 2-- | 3--            | 4-- | 5--                       | 6-- 7-- |
| 2. All in all, I am satisfied with my job.                                                   | 1--                          | 2-- | 3--            | 4-- | 5--                       | 6-- 7-- |
| 3. In general, I don't like working at this company<br>(reverse-scored).                     | 1--                          | 2-- | 3--            | 4-- | 5--                       | 6-- 7-- |
| <b><i>TQM involvement</i></b>                                                                |                              |     |                |     |                           |         |
| 1. This employee participates in the decision making<br>process.                             | 1--                          | 2-- | 3--            | 4-- | 5--                       | 6-- 7-- |
| 2. This employee participates in quality<br>improvement activities.                          | 1--                          | 2-- | 3--            | 4-- | 5--                       | 6-- 7-- |
| 3. This employee takes part in designing quality<br>improvement activities.                  | 1--                          | 2-- | 3--            | 4-- | 5--                       | 6-- 7-- |
| 4. This employee implements changes.                                                         | 1--                          | 2-- | 3--            | 4-- | 5--                       | 6-- 7-- |
| 5. This employee takes initiatives.                                                          | 1--                          | 2-- | 3--            | 4-- | 5--                       | 6-- 7-- |
| 6. This employee does not participate in quality<br>improvement activities (reverse-scored). | 1--                          | 2-- | 3--            | 4-- | 5--                       | 6-- 7-- |

## **SECTION II General Information**

1. Please select your gender. ☐ Female ☐ Male
2. Please indicate your age range.  
☐ under 20 years ☐ 20 to 30 years ☐ 30 to 4 years  
☐ 40 to 50 years ☐ 50 to 60 years ☐ 60 years or older
3. Please check your education level.  
☐ High school ☐ Bachelor ☐ Master
4. Please select your tenure in this company.  
☐ under 5 years ☐ 6 to 10 years ☐ 11 to 15 years  
☐ 16 to 20 years ☐ 21 years or older

Any comments:

---

---

---

---
